# Supplementary material for: PRMT3 inhibitor SGC707 reduces triglyceride levels and induces pruritus in Western-type diet-fed LDL receptor knockout mice
Source: PubMed Central journal article supplement (PMC8748717; doi:10.1038/s41598-021-04524-w), 2022-01-10
Supplement: 41598_2021_4524_MOESM1_ESM.pdf [file 41598_2021_4524_MOESM1_ESM.pdf]

**Supplemental Table 1: Plasma metabolite profile of Western-type diet-fed male LDL receptor knockout mice treated with the PRMT3 inhibitor SGC707 or the solvent control.**

| <b>METABOLITE SPECIES</b> | <b>CONTROL</b> | <b>SGC707</b> | <b>P-value</b>    |
|---------------------------|----------------|---------------|-------------------|
| COR                       | 1,00 ± 0,19    | 0,97 ± 0,11   | N.S.              |
| a-LEA                     | 1,00 ± 0,23    | 0,84 ± 0,11   | N.S.              |
| POEA                      | 1,00 ± 0,22    | 0,61 ± 0,08   | N.S.              |
| PDEA                      | 1,00 ± 0,27    | 0,81 ± 0,12   | N.S.              |
| LEA                       | 1,00 ± 0,08    | 1,06 ± 0,04   | N.S.              |
| AEA                       | 1,00 ± 0,16    | 0,68 ± 0,04   | N.S.              |
| O-AEA                     | 1,00 ± 0,16    | 0,62 ± 0,05   | N.S.              |
| DHEA                      | 1,00 ± 0,18    | 1,31 ± 0,29   | N.S.              |
| 2-AG                      | 1,00 ± 0,14    | 1,23 ± 0,15   | N.S.              |
| 1-AG                      | 1,00 ± 0,18    | 1,16 ± 0,17   | N.S.              |
| 2-LG                      | 1,00 ± 0,15    | 1,29 ± 0,15   | N.S.              |
| 1-LG                      | 1,00 ± 0,13    | 0,92 ± 0,16   | N.S.              |
| PEA                       | 1,00 ± 0,06    | 0,99 ± 0,12   | N.S.              |
| DGLEA                     | 1,00 ± 0,11    | 1,07 ± 0,15   | N.S.              |
| 2-AGE                     | 1,00 ± 0,33    | 1,16 ± 0,55   | N.S.              |
| 2-OG                      | 1,00 ± 0,13    | 0,99 ± 0,18   | N.S.              |
| 1-OG                      | 1,00 ± 0,07    | 0,95 ± 0,26   | N.S.              |
| SEA                       | 1,00 ± 0,08    | 1,35 ± 0,29   | N.S.              |
| NADA                      | 1,00 ± 0,42    | 0,31 ± 0,09   | N.S.              |
| OEA                       | 1,00 ± 0,10    | 1,03 ± 0,10   | N.S.              |
| ETAEA                     | 1,00 ± 0,55    | 1,56 ± 0,60   | N.S.              |
| 20-hydroxy-PGF2a          | 1,00 ± 0,42    | 1,41 ± 0,52   | N.S.              |
| 20-hydroxy-PGE2           | 1,00 ± 0,11    | 1,69 ± 0,24   | N.S.              |
| 2,3-dinor-8-iso-PGF2a     | 1,00 ± 0,17    | 1,10 ± 0,21   | N.S.              |
| 2,3-dinor-11B-iso-PGF2a   | 1,00 ± 0,11    | 1,39 ± 0,19   | N.S.              |
| 20-carboxy-LTB4           | 1,00 ± 0,35    | 0,65 ± 0,17   | N.S.              |
| 20-hydroxy-LTB4           | 1,00 ± 0,18    | 2,79 ± 1,19   | <b>&lt; 0.001</b> |
| iPF2a                     | 1,00 ± 0,22    | 1,03 ± 0,27   | N.S.              |
| 8-iso-15-R-PGF2a          | 1,00 ± 0,21    | 1,04 ± 0,13   | N.S.              |

|                                   |             |             |      |
|-----------------------------------|-------------|-------------|------|
| 8-iso-PGF2a                       | 1,00 ± 0,19 | 0,85 ± 0,13 | N.S. |
| 11beta-PGF2a                      | 1,00 ± 0,06 | 1,03 ± 0,10 | N.S. |
| PGF2a                             | 1,00 ± 0,22 | 1,07 ± 0,10 | N.S. |
| PGE3                              | 1,00 ± 0,23 | 1,09 ± 0,09 | N.S. |
| PGD3                              | 1,00 ± 0,13 | 0,95 ± 0,14 | N.S. |
| 8-iso-PGE2                        | 1,00 ± 0,11 | 1,58 ± 0,36 | N.S. |
| PGE2                              | 1,00 ± 0,10 | 1,47 ± 0,33 | N.S. |
| 11beta-PGE2                       | 1,00 ± 0,10 | 1,32 ± 0,32 | N.S. |
| PGD2                              | 1,00 ± 0,14 | 1,57 ± 0,33 | N.S. |
| TXB2                              | 1,00 ± 0,62 | 0,67 ± 0,50 | N.S. |
| 5-iPF2a VI_1                      | 1,00 ± 0,05 | 1,48 ± 0,25 | N.S. |
| 5-iPF2a VI_2                      | 1,00 ± 0,05 | 1,48 ± 0,24 | N.S. |
| 8,12-iPF2a IV                     | 1,00 ± 0,04 | 0,95 ± 0,10 | N.S. |
| 9,12,13-TriHOME                   | 1,00 ± 0,27 | 1,02 ± 0,23 | N.S. |
| 9,10,13-TriHOME                   | 1,00 ± 0,18 | 1,19 ± 0,31 | N.S. |
| 8-iso-13,14-dihydro-15-keto-PGF2a | 1,00 ± 0,09 | 1,11 ± 0,11 | N.S. |
| 13,14dihydro-15-keto-PGF2a        | 1,00 ± 0,13 | 1,74 ± 0,36 | N.S. |
| GUDCA                             | 1,00 ± 0,03 | 1,15 ± 0,05 | N.S. |
| 13,14-dihydro-PGF2a               | 1,00 ± 0,18 | 1,32 ± 0,29 | N.S. |
| GCA                               | 1,00 ± 0,34 | 0,90 ± 0,17 | N.S. |
| 13,14-dihydro-15-keto-PGE2        | 1,00 ± 0,13 | 1,29 ± 0,26 | N.S. |
| 13,14-dihydro-15-keto-PGD2        | 1,00 ± 0,11 | 1,17 ± 0,16 | N.S. |
| 5S,6R-LipoxinA4                   | 1,00 ± 0,11 | 1,46 ± 0,23 | N.S. |
| 5S,6S-LipoxinA4                   | 1,00 ± 0,16 | 1,32 ± 0,20 | N.S. |
| 1a,1b-dihomo-PGF2a                | 1,00 ± 0,15 | 1,05 ± 0,14 | N.S. |
| CA                                | 1,00 ± 0,51 | 0,31 ± 0,11 | N.S. |
| GCDCA                             | 1,00 ± 0,01 | 1,05 ± 0,04 | N.S. |
| GDCA                              | 1,00 ± 0,03 | 1,06 ± 0,03 | N.S. |
| bicyclo-PGE2                      | 1,00 ± 0,17 | 1,18 ± 0,17 | N.S. |
| 12,13-DiHODE                      | 1,00 ± 0,09 | 1,05 ± 0,13 | N.S. |
| 8S,15S-DiHETE                     | 1,00 ± 0,25 | 1,31 ± 0,25 | N.S. |
| 10S,17S-DiHDoHE                   | 1,00 ± 0,36 | 1,01 ± 0,35 | N.S. |

|                |             |             |      |
|----------------|-------------|-------------|------|
| 17,18-DiHETE   | 1,00 ± 0,03 | 1,00 ± 0,12 | N.S. |
| 14,15-DiHETE   | 1,00 ± 0,08 | 1,10 ± 0,22 | N.S. |
| 12,13-DiHOME   | 1,00 ± 0,08 | 0,67 ± 0,07 | N.S. |
| 9,10-DiHOME    | 1,00 ± 0,04 | 1,00 ± 0,15 | N.S. |
| 14,15-DiHETrE  | 1,00 ± 0,06 | 1,29 ± 0,34 | N.S. |
| 12S-HHTrE      | 1,00 ± 0,71 | 0,72 ± 0,51 | N.S. |
| 19,20-DiHDPA   | 1,00 ± 0,04 | 1,20 ± 0,22 | N.S. |
| CDCA           | 1,00 ± 0,20 | 1,20 ± 0,18 | N.S. |
| 11,12-DiHETrE  | 1,00 ± 0,08 | 1,23 ± 0,31 | N.S. |
| DCA            | 1,00 ± 0,37 | 0,46 ± 0,26 | N.S. |
| 9-HOTrE        | 1,00 ± 0,12 | 0,86 ± 0,08 | N.S. |
| 8,9-DiHETrE    | 1,00 ± 0,06 | 1,68 ± 0,38 | N.S. |
| GLCA           | 1,00 ± 0,08 | 1,13 ± 0,06 | N.S. |
| (+/-) 18-HEPE  | 1,00 ± 0,12 | 0,56 ± 0,05 | N.S. |
| 15S-HEPE       | 1,00 ± 0,07 | 1,28 ± 0,13 | N.S. |
| 20-HETE        | 1,00 ± 0,04 | 0,85 ± 0,08 | N.S. |
| 5,6-DiHETrE    | 1,00 ± 0,05 | 1,15 ± 0,06 | N.S. |
| 12(S)-HEPE     | 1,00 ± 0,36 | 1,37 ± 0,32 | N.S. |
| (+/-) 9HEPE    | 1,00 ± 0,12 | 1,15 ± 0,23 | N.S. |
| 13-HODE        | 1,00 ± 0,09 | 1,03 ± 0,08 | N.S. |
| 12,13-EpOME    | 1,00 ± 0,10 | 0,68 ± 0,04 | N.S. |
| 5(S)-HEPE      | 1,00 ± 0,11 | 1,03 ± 0,13 | N.S. |
| 9-HODE         | 1,00 ± 0,10 | 1,14 ± 0,15 | N.S. |
| 9,10-EpOME     | 1,00 ± 0,09 | 1,02 ± 0,03 | N.S. |
| (+/-) 17-HDoHE | 1,00 ± 0,40 | 0,57 ± 0,08 | N.S. |
| (+/-) 13-HDoHE | 1,00 ± 0,05 | 1,22 ± 0,16 | N.S. |
| (+/-) 7-HDoHE  | 1,00 ± 0,36 | 0,17 ± 0,01 | N.S. |
| (+/-) 4-HDoHE  | 1,00 ± 0,08 | 1,09 ± 0,14 | N.S. |
| 19(20)-EpDPE   | 1,00 ± 0,09 | 1,14 ± 0,13 | N.S. |
| (+/-) 20-HDoHE | 1,00 ± 0,10 | 1,50 ± 0,23 | N.S. |
| 15-HETE        | 1,00 ± 0,06 | 1,41 ± 0,19 | N.S. |
| 14,15-EpETrE   | 1,00 ± 0,08 | 1,51 ± 0,29 | N.S. |

|                                                     |             |             |      |
|-----------------------------------------------------|-------------|-------------|------|
| (+/-) 16-HDoHE                                      | 1,00 ± 0,13 | 1,36 ± 0,21 | N.S. |
| 16(17)-EpDPE                                        | 1,00 ± 0,10 | 1,71 ± 0,34 | N.S. |
| 11-HETE                                             | 1,00 ± 0,08 | 1,15 ± 0,16 | N.S. |
| 9-HETE                                              | 1,00 ± 0,14 | 1,14 ± 0,19 | N.S. |
| 11(12)-EpETrE                                       | 1,00 ± 0,03 | 1,30 ± 0,26 | N.S. |
| (+/-) 14-HDoHE                                      | 1,00 ± 0,30 | 1,30 ± 0,25 | N.S. |
| (+/-) 10-HDoHE                                      | 1,00 ± 0,08 | 1,42 ± 0,24 | N.S. |
| 12-HETE                                             | 1,00 ± 0,33 | 1,38 ± 0,41 | N.S. |
| 8-HETE                                              | 1,00 ± 0,16 | 0,98 ± 0,07 | N.S. |
| 8(9)-EpETrE                                         | 1,00 ± 0,22 | 0,79 ± 0,09 | N.S. |
| (+/-) 11-HDoHE                                      | 1,00 ± 0,09 | 1,12 ± 0,11 | N.S. |
| 15(S)-HETrE                                         | 1,00 ± 0,10 | 1,10 ± 0,14 | N.S. |
| (+/-) 8-HDoHE                                       | 1,00 ± 0,09 | 1,24 ± 0,13 | N.S. |
| 5-HETE                                              | 1,00 ± 0,08 | 0,92 ± 0,09 | N.S. |
| 8(S)-HETrE                                          | 1,00 ± 0,19 | 1,00 ± 0,14 | N.S. |
| 5(S)-HETrE                                          | 1,00 ± 0,08 | 0,64 ± 0,11 | N.S. |
| Palmitic acid (16:0)                                | 1,00 ± 0,20 | 0,67 ± 0,06 | N.S. |
| Stearic acid (18:0)                                 | 1,00 ± 0,25 | 0,69 ± 0,10 | N.S. |
| Linoleic acid (18:2- $\omega$ 6)                    | 1,00 ± 0,20 | 0,50 ± 0,05 | N.S. |
| $\alpha$ -Linolenic acid (18:3- $\omega$ 3)         | 1,00 ± 0,21 | 0,41 ± 0,04 | N.S. |
| $\gamma$ -Linolenic acid (18:3- $\omega$ 6)         | 1,00 ± 0,21 | 0,42 ± 0,04 | N.S. |
| Dihomo- $\gamma$ -linolenic acid (20:3- $\omega$ 6) | 1,00 ± 0,23 | 0,51 ± 0,06 | N.S. |
| Mead acid (20:3- $\omega$ 9)                        | 1,00 ± 0,20 | 0,52 ± 0,07 | N.S. |
| AA (20:4- $\omega$ 6)                               | 1,00 ± 0,34 | 0,43 ± 0,03 | N.S. |
| Eicosapentaenoic acid (20:5- $\omega$ 3)            | 1,00 ± 0,18 | 0,70 ± 0,10 | N.S. |
| Docosapentaenoic acid (22:5- $\omega$ 3)            | 1,00 ± 0,11 | 0,82 ± 0,09 | N.S. |
| Docosatetraenoic acid (22:4- $\omega$ 6)            | 1,00 ± 0,21 | 0,74 ± 0,07 | N.S. |
| Docosahexaenoic acid (22:6- $\omega$ 3)             | 1,00 ± 0,11 | 0,66 ± 0,05 | N.S. |
| S-1-P 16(1)                                         | 1,00 ± 0,07 | 0,80 ± 0,09 | N.S. |
| S-1-P 18(0)                                         | 1,00 ± 0,06 | 0,99 ± 0,05 | N.S. |
| S-1-P 18(1)                                         | 1,00 ± 0,03 | 1,02 ± 0,03 | N.S. |
| S-1-P 18(2)                                         | 1,00 ± 0,03 | 0,88 ± 0,04 | N.S. |

|            |             |             |      |
|------------|-------------|-------------|------|
| LPE (14:0) | 1,00 ± 0,12 | 0,94 ± 0,12 | N.S. |
| LPE (16:0) | 1,00 ± 0,03 | 1,24 ± 0,09 | N.S. |
| LPE (16:1) | 1,00 ± 0,10 | 0,90 ± 0,10 | N.S. |
| LPE (18:0) | 1,00 ± 0,10 | 1,18 ± 0,21 | N.S. |
| LPE (18:1) | 1,00 ± 0,02 | 1,07 ± 0,04 | N.S. |
| LPE (18:2) | 1,00 ± 0,05 | 1,01 ± 0,04 | N.S. |
| LPE (18:3) | 1,00 ± 0,11 | 1,05 ± 0,07 | N.S. |
| LPE (20:3) | 1,00 ± 0,04 | 0,99 ± 0,10 | N.S. |
| LPE (20:4) | 1,00 ± 0,04 | 1,23 ± 0,08 | N.S. |
| LPE (20:5) | 1,00 ± 0,06 | 1,28 ± 0,10 | N.S. |
| LPE (22:4) | 1,00 ± 0,04 | 0,95 ± 0,09 | N.S. |
| LPE (22:5) | 1,00 ± 0,04 | 0,86 ± 0,12 | N.S. |
| LPE (22:6) | 1,00 ± 0,06 | 1,23 ± 0,10 | N.S. |
| LPI 14(0)  | 1,00 ± 0,08 | 0,67 ± 0,04 | N.S. |
| LPI 16(0)  | 1,00 ± 0,10 | 0,89 ± 0,07 | N.S. |
| LPI 16(1)  | 1,00 ± 0,05 | 0,73 ± 0,02 | N.S. |
| LPI 18(0)  | 1,00 ± 0,07 | 1,13 ± 0,11 | N.S. |
| LPI 18(1)  | 1,00 ± 0,11 | 0,74 ± 0,05 | N.S. |
| LPI 18(2)  | 1,00 ± 0,08 | 0,80 ± 0,06 | N.S. |
| LPI 20(4)  | 1,00 ± 0,04 | 1,21 ± 0,12 | N.S. |
| LPI 22(4)  | 1,00 ± 0,10 | 0,91 ± 0,03 | N.S. |
| LPI 22(6)  | 1,00 ± 0,20 | 0,82 ± 0,02 | N.S. |
| LPA 14(0)  | 1,00 ± 0,13 | 0,77 ± 0,11 | N.S. |
| LPA 16(0)  | 1,00 ± 0,04 | 0,92 ± 0,09 | N.S. |
| LPA 16(1)  | 1,00 ± 0,09 | 0,73 ± 0,10 | N.S. |
| LPA 18(0)  | 1,00 ± 0,06 | 0,90 ± 0,10 | N.S. |
| LPA 18(1)  | 1,00 ± 0,05 | 0,76 ± 0,03 | N.S. |
| LPA 18(2)  | 1,00 ± 0,08 | 0,84 ± 0,06 | N.S. |
| LPA 20(3)  | 1,00 ± 0,02 | 0,80 ± 0,07 | N.S. |
| LPA 20(4)  | 1,00 ± 0,06 | 0,93 ± 0,05 | N.S. |
| LPA 20(5)  | 1,00 ± 0,09 | 0,94 ± 0,05 | N.S. |
| LPA 22(4)  | 1,00 ± 0,07 | 0,77 ± 0,21 | N.S. |

|            |             |             |                   |
|------------|-------------|-------------|-------------------|
| LPA 22(6)  | 1,00 ± 0,06 | 1,07 ± 0,08 | N.S.              |
| LPG 22(6)  | 1,00 ± 0,03 | 1,37 ± 0,07 | N.S.              |
| LPG 22(4)  | 1,00 ± 0,08 | 1,02 ± 0,05 | N.S.              |
| LPG 20(5)  | 1,00 ± 0,23 | 0,52 ± 0,14 | N.S.              |
| LPG 20(4)  | 1,00 ± 0,02 | 0,94 ± 0,04 | N.S.              |
| LPG 20(3)  | 1,00 ± 0,14 | 1,02 ± 0,10 | N.S.              |
| LPG 18(3)  | 1,00 ± 0,12 | 1,05 ± 0,06 | N.S.              |
| LPG 18(2)  | 1,00 ± 0,07 | 1,15 ± 0,02 | N.S.              |
| LPG 18(1)  | 1,00 ± 0,08 | 0,85 ± 0,06 | N.S.              |
| LPG 18(0)  | 1,00 ± 0,06 | 1,14 ± 0,15 | N.S.              |
| LPG 16(1)  | 1,00 ± 0,06 | 0,67 ± 0,04 | N.S.              |
| LPG 16(0)  | 1,00 ± 0,08 | 0,67 ± 0,05 | N.S.              |
| LPG 14(0)  | 1,00 ± 0,15 | 0,57 ± 0,04 | N.S.              |
| LPS 16(0)  | 1,00 ± 0,08 | 1,07 ± 0,18 | N.S.              |
| LPS 18(0)  | 1,00 ± 0,19 | 1,24 ± 0,30 | N.S.              |
| LPS 18(1)  | 1,00 ± 0,48 | 1,53 ± 0,06 | N.S.              |
| LPS 18(2)  | 1,00 ± 0,31 | 0,90 ± 0,10 | N.S.              |
| LPS 20(4)  | 1,00 ± 0,24 | 1,01 ± 0,11 | N.S.              |
| LPS 22(4)  | 1,00 ± 0,11 | 1,00 ± 0,13 | N.S.              |
| LPS 22(6)  | 1,00 ± 0,19 | 1,12 ± 0,14 | N.S.              |
| cLPA 18(0) | 1,00 ± 1,00 | 0,00 ± 0,00 | N.S.              |
| cLPA 18(1) | 1,00 ± 1,00 | 0,00 ± 0,00 | N.S.              |
| cLPA 18(2) | 1,00 ± 1,00 | 0,00 ± 0,00 | N.S.              |
| cLPA 20(4) | 1,00 ± 1,00 | 0,00 ± 0,00 | N.S.              |
| TCA        | 1,00 ± 0,56 | 2,80 ± 1,03 | <b>&lt; 0.001</b> |
| GCDCA      | 1,00 ± 0,43 | 1,30 ± 0,33 | N.S.              |
| GDCA       | 1,00 ± 0,13 | 0,75 ± 0,20 | N.S.              |
| GCA        | 1,00 ± 0,72 | 0,87 ± 0,37 | N.S.              |
| THDCA      | 1,00 ± 0,49 | 3,51 ± 1,37 | <b>&lt; 0.001</b> |
| TDCA       | 1,00 ± 0,54 | 3,29 ± 1,46 | <b>&lt; 0.001</b> |
| TCDCa      | 1,00 ± 0,52 | 0,81 ± 0,20 | N.S.              |
| CUDA       | 1,00 ± 0,03 | 1,02 ± 0,03 | N.S.              |

|        |             |             |      |
|--------|-------------|-------------|------|
| TLCA   | 1,00 ± 0,48 | 0,76 ± 0,19 | N.S. |
| LCA-3S | 1,00 ± 0,19 | 1,06 ± 0,31 | N.S. |

---

Values are expressed relative to the Control and represent the means±SEM of 4/5 plasma pools. N.S., not significant
